# Supplementary material
Source: publisher site journal article supplement (https://www.dovepress.com/article/473133)
Supplement: Supplementary file 1 [file get_supplementary_file.php]

Table S1 The allele and genotype distribution of 9 SNPs in different stages of CC groups

| **SNPs** | **Allele/Genotype** | **CIN n (%)** | **CC n (%)** | | **CC I vs CIN** | | **CC II+III+IV vs CIN** | | **CC II+III+IV vs CC I** | |
| --- | --- | --- | --- | --- | --- | --- | --- | --- | --- | --- |
| I | II+III+IV | OR (95%CI) | *P* | OR (95%CI) | *P* | OR (95%CI) | *P* |
| rs895819 | T | 590(70.1) | 838(74.4) | 461(74.8) | 1.24(1.02-1.52) | 0.032 | 1.27(1.01-1.61) | 0.045 | 1.02(0.81-1.28) | 0.849 |
|  | C | 252(29.9) | 288(25.6) | 155(25.2) |  |  |  |  |  |  |
|  | T/T | 209(49.6) | 312(55.4) | 176(57.1) |  |  |  |  |  |  |
|  | C/T | 172(40.9) | 214(38.0) | 109(35.4) |  | 0.098 |  | 0.127 |  | 0.702 |
|  | C/C | 40(9.5) | 37(6.6) | 23(7.5) |  |  |  |  |  |  |
| rs10061133 | A | 614(72.9) | 820(72.8) | 441(71.6) | 1.00(0.81-1.22) | 0.962 | 0.94(0.74-1.18) | 0.575 | 0.94(0.76-1.17) | 0.582 |
|  | G | 228(27.1) | 306(27.2) | 175(28.4) |  |  |  |  |  |  |
|  | A/A | 212(50.4) | 289(51.3) | 160(51.9) |  |  |  |  |  |  |
|  | A/G | 190(45.1) | 242(43.0) | 121(39.3) |  | 0.627 |  | 0.037 |  | 0.177 |
|  | G/G | 19(4.5) | 32(5.7) | 27(8.8) |  |  |  |  |  |  |
| rs41291179 | A | 833(98.9) | 1117(99.2) | 614(99.7) | 1.34(0.53-3.39) | 0.534 | 3.32(0.71-15.41) | 0.105 | 2.47(0.53-11.48) | 0.232 |
|  | T | 9(1.1) | 9(0.8) | 2(0.3) |  |  |  |  |  |  |
|  | A/A | 412(97.9) | 554(98.4) | 306(99.4) |  | 0.532 |  | 0.104 |  | 0.230 |
|  | A/T | 9(2.1) | 9(1.6) | 2(0.6) |  |  |  |  |  |  |
| rs76481776 | C | 834(99.0) | 1099(97.6) | 597(96.9) | 0.39(0.18-0.86) | 0.016 | 0.30(0.13-0.69) | 0.003 | 0.77(0.43-1.40) | 0.393 |
|  | T | 8(1.0) | 27(2.4) | 19(3.1) |  |  |  |  |  |  |
|  | C/C | 413(98.1) | 538(95.5) | 290(94.2) |  |  |  |  |  |  |
|  | C/T | 8(1.9) | 23(4.1) | 17(5.5) |  | 0.071 |  | 0.015 |  | 0.626 |
|  | T/T | 0 | 2(0.4) | 1(0.3) |  |  |  |  |  |  |
| rs10406069 | G | 618(73.4) | 865(76.8) | 475(77.1) | 1.20(0.98-1.48) | 0.081 | 1.22(0.96-1.56) | 0.106 | 1.02(0.80-1.28) | 0.891 |
|  | A | 224(26.6) | 261(23.2) | 141(22.9) |  |  |  |  |  |  |
|  | G/G | 227(53.9) | 339(60.2) | 179(58.1) |  |  |  |  |  |  |
|  | A/G | 164(39.0) | 187(33.2) | 117(38.0) |  | 0.136 |  | 0.148 |  | 0.137 |
|  | A/A | 30(7.1) | 37(6.6) | 12(3.9) |  |  |  |  |  |  |
| rs12803915 | G | 689(81.8) | 945(83.9) | 518(84.1) | 1.16(0.92-1.47) | 0.220 | 1.17(0.89-1.55) | 0.258 | 1.01(0.77-1.32) | 0.928 |
|  | A | 153(18.2) | 181(16.1) | 98(15.9) |  |  |  |  |  |  |
|  | G/G | 276(65.6) | 404(71.8) | 218(70.8) |  |  |  |  |  |  |
|  | A/G | 137(32.5) | 137(24.3) | 82(26.6) |  | 0.006 |  | 0.204 |  | 0.488 |
|  | A/A | 8(1.9) | 22(3.9) | 8(2.6) |  |  |  |  |  |  |
| rs550894 | C | 620(73.6) | 876(77.8) | 481(78.1) | 1.25(1.02-1.54) | 0.032 | 1.28(1.00-1.63) | 0.051 | 1.02(0.80-1.29) | 0.890 |
|  | A | 222(26.4) | 250(22.2) | 135(21.9) |  |  |  |  |  |  |
|  | C/C | 229(54.4) | 336(59.7) | 186(60.4) |  |  |  |  |  |  |
|  | A/C | 162(38.5) | 204(36.2) | 109(35.4) |  | 0.060 |  | 0.127 |  | 0.968 |
|  | A/A | 30(7.1) | 23(4.1) | 13(4.2) |  |  |  |  |  |  |
| rs66683138 | G | 484(57.5) | 667(59.2) | 373(60.6) | 1.07(0.90-1.29) | 0.435 | 1.14(0.92-1.40) | 0.239 | 1.06(0.86-1.29) | 0.592 |
|  | A | 358(42.5) | 459(40.8) | 243(39.4) |  |  |  |  |  |  |
|  | G/G | 139(33.0) | 207(36.8) | 117(38.0) |  |  |  |  |  |  |
|  | A/G | 206(48.9) | 253(44.9) | 139(45.1) |  | 0.408 |  | 0.380 |  | 0.859 |
|  | A/A | 76(18.1) | 103(18.3) | 52(16.9) |  |  |  |  |  |  |
| rs2620381 | A | 772(91.7) | 1032(91.7) | 561(91.1) | 1.00(0.72-1.38) | 0.978 | 0.92(0.64-1.34) | 0.679 | 0.93(0.66-1.32) | 0.679 |
|  | C | 70(8.3) | 94(8.3) | 55(8.9) |  |  |  |  |  |  |
|  | A/A | 352(83.6) | 475(84.3) | 256(83.1) |  |  |  |  |  |  |
|  | A/C | 68(16.2) | 82(14.6) | 49(15.9) |  | 0.255 |  | 0.413 |  | 0.864 |
|  | C/C | 1(0.2) | 6(1.1) | 3(1.0) |  |  |  |  |  |  |

**Note:** The statistical significant threshold was set at *P* < 0.005 after Bonferroni correction.
